# Supplementary material
Source: HighWire-hosted journal article supplement (https://thorax.bmj.com/content/77/10/950)

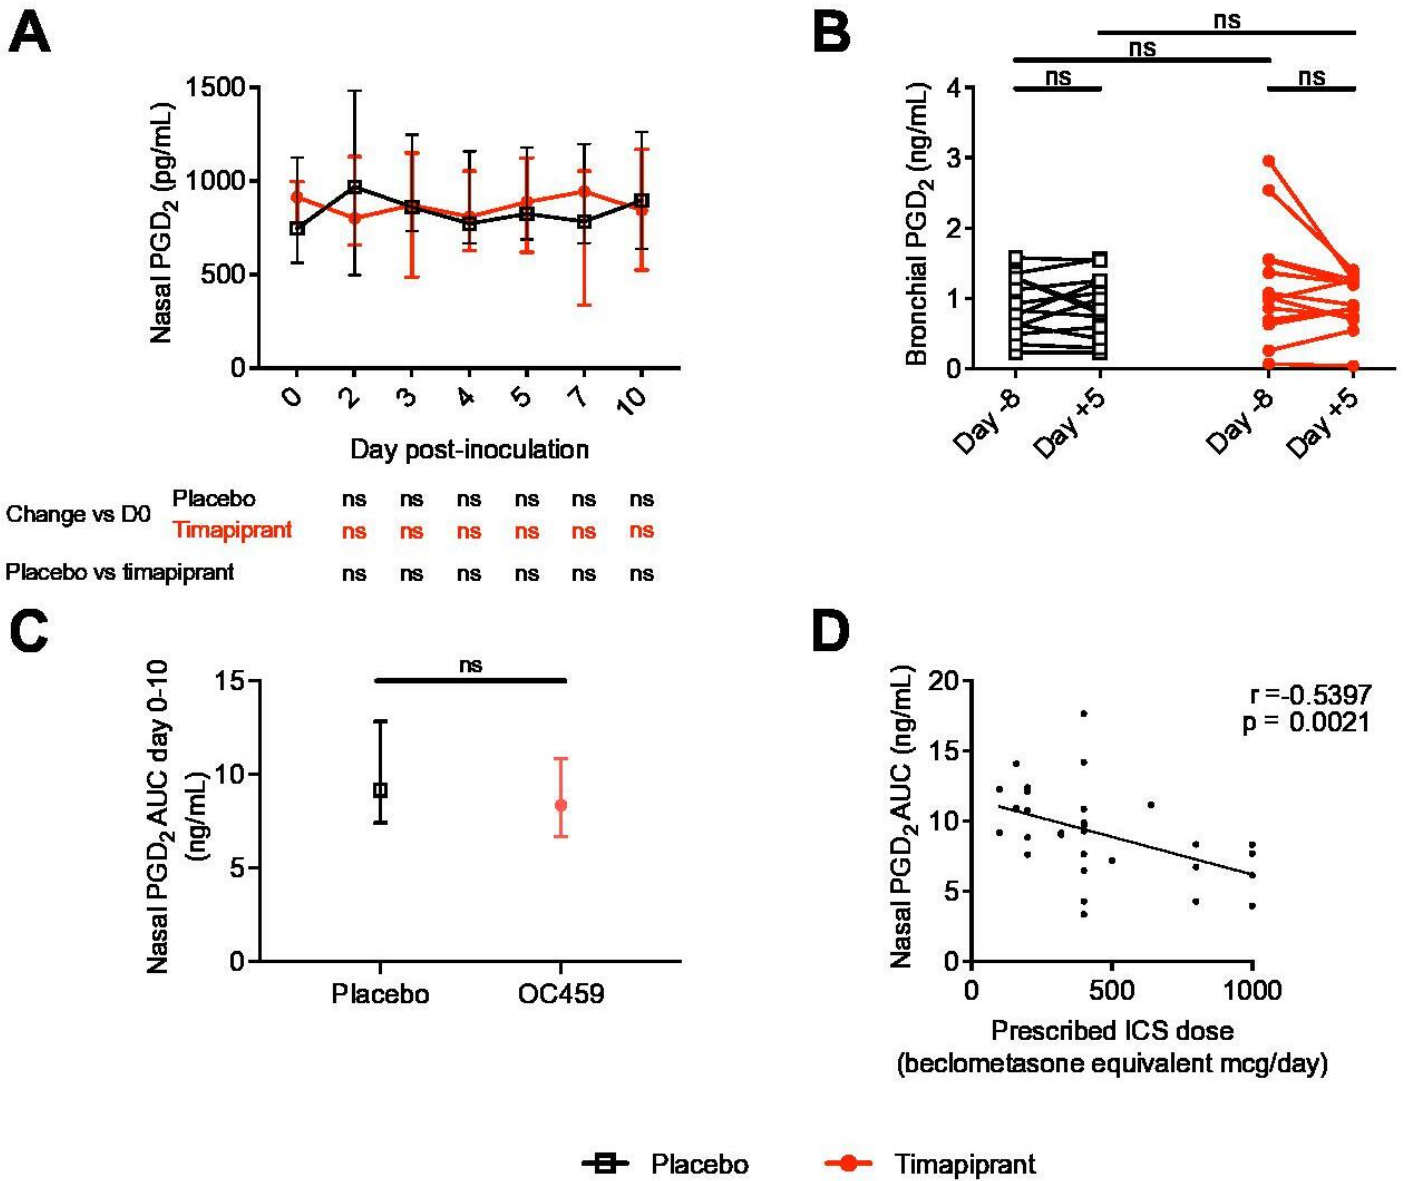

Supplement: inline-supplementary-material-3 [file inline-supplementary-material-3.pdf]
